# Supplementary material for: Complex molecular mechanisms underlying MYMIV-resistance in Vigna mungo revealed by comparative transcriptome profiling
Source: PubMed Central journal article supplement (PMC6586629; doi:10.1038/s41598-019-45383-w), 2019-06-20
Supplement: 41598_2019_45383_MOESM1_ESM.pdf [file 41598_2019_45383_MOESM1_ESM.pdf]

**Complex molecular mechanisms underlying MYMIV-resistance in *Vigna mungo* revealed by comparative transcriptome profiling**

Anirban Kundu<sup>1,2\*</sup>, Pankaj Kumar Singh<sup>1\*</sup>, Avishek Dey<sup>1</sup>, Sayak Ganguli<sup>3</sup> and Amita Pal<sup>\*\*1</sup>

<sup>1</sup>Division of Plant Biology, Bose Institute, Kolkata-700054, India.

<sup>2</sup>Ramakrishna Mission Vivekananda Centenary College, Rahara, Kolkata- 7000118, India.

<sup>3</sup>Theoretical and Computational Biology, AIST, Palta, Kolkata, India.

\* Both the authors contributed equally

\*\* Corresponding Author: [amita@jcbose.ac.in](mailto:amita@jcbose.ac.in)

**Supplementary Figure S1:** NGS workflow blueprint for the RNA sequencing data.

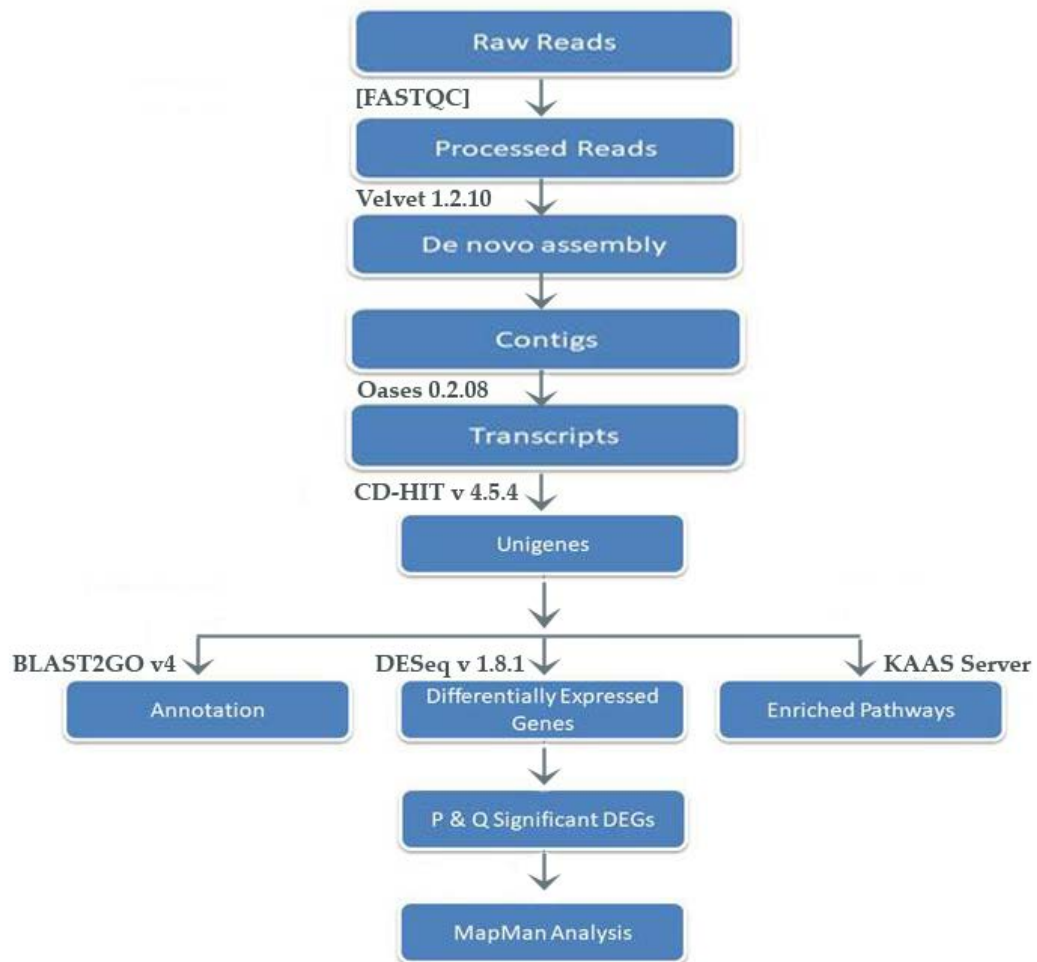

**Supplementary Table S2: Primers list of transcripts used for qPCR analyses.** Sequence information and amplicon characteristics of primers of 15 candidate genes used for qPCR expression analyses.

| Sl. No. | Name                                 | Sequence (5' to 3') |                         | Amplicon Length (bp) |
|---------|--------------------------------------|---------------------|-------------------------|----------------------|
| 1.      | Calmodulin (CAM)                     | F                   | CGAAGAATGCCACAACATGA    | 237                  |
|         |                                      | R                   | CTACTCAGGGCGATTGAAC     |                      |
| 2.      | Heat shock protein 70 (HSP70)        | F                   | TTCAAACCCCTCCTTGGGACAC  | 203                  |
|         |                                      | R                   | GAATGAAAGCTGGCCAGAAG    |                      |
| 3.      | ABC transporter (ABC)                | F                   | CAGGCCTATGTGACTCAAG     | 180                  |
|         |                                      | R                   | ACTCTCCTCTTCTGTCTCTCC   |                      |
| 4.      | NAC transcription factor (NAC)       | F                   | GTGGAGGGTGTGAAGGTTATC   | 224                  |
|         |                                      | R                   | CTCCGTCTCAGGTTCCCATGG   |                      |
| 5.      | Defensin (DEF)                       | F                   | GTGGCTCTGAGACTCACATG    | 166                  |
|         |                                      | R                   | CCGGTAAGCCTTCTCCACGC    |                      |
| 6.      | Argonaute (AGO)                      | F                   | GACGTGTCTCTGCTGGCAG     | 250                  |
|         |                                      | R                   | ACACCTCCTCTACATCAGC     |                      |
| 7.      | Ankyrin (ANK)                        | F                   | TACCACCCGTTGCACATAGC    | 209                  |
|         |                                      | R                   | GCAGGCAAGTACAACCCATC    |                      |
| 8.      | E3- Ubiquitin ligase(E3 UBL)         | F                   | GTTTCGATATGCTTCAGGC     | 139                  |
|         |                                      | R                   | AGAGCTGCCTGAATGAAATG    |                      |
| 9.      | R-gene (NB-LRR)                      | F                   | CATGGGCTGGAACACCTCC     | 236                  |
|         |                                      | R                   | GCTCTCTATTTCAGTGTCTTGAC |                      |
| 10.     | Superoxide dismutase (SOD)           | F                   | CCCTTGTCTGGGGAGGTTAT    | 209                  |
|         |                                      | R                   | GCACATCACACCATCCAAGGT   |                      |
| 11.     | WRKY transcription factor (WRKY33)   | F                   | GATCACGAATCTCTCTCAGG    | 238                  |
|         |                                      | R                   | CGCTGGACCCCTCTAACAC     |                      |
| 12.     | Thioredoxin (TRX)                    | F                   | GAATCACTCCTCTGCGGTTTC   | 168                  |
|         |                                      | R                   | TCCATAGCGGGAGAGATGAG    |                      |
| 13.     | Peroxidase (PER)                     | F                   | CTTGGCACAAAGCCTAGCTC    | 164                  |
|         |                                      | R                   | GAGCAGCCCAATATACTCGC    |                      |
| 14.     | Cysteine protease (CSP)              | F                   | TCCTGCAAATTTGATAAAAAGCA | 190                  |
|         |                                      | R                   | ATGGCATGAGACACCACCA     |                      |
| 15.     | Pathogenesis related protein 1 (PR1) | F                   | CTGGCAAAGCCAAGAGTGAT    | 248                  |
|         |                                      | R                   | AGCTCTCACAATTATGCAGC    |                      |
